# Supplementary material
Source: PubMed Central journal article supplement (PMC6529271)
Supplement: NIHMS1525877-supplement-3.pdf [file NIHMS1525877-supplement-3.pdf]

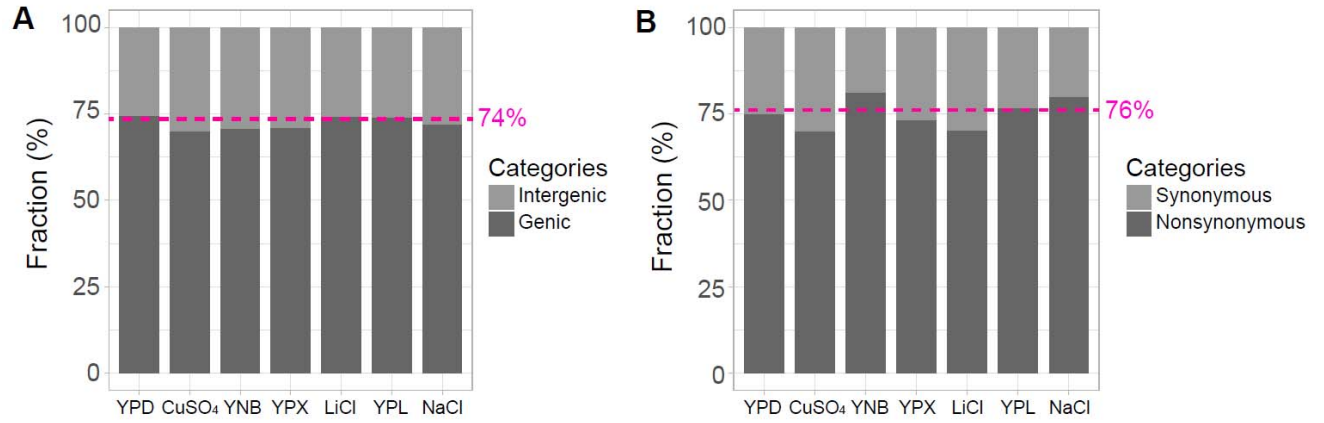

**Figure S1. Test of selection during MA in the seven environments. Related to Figure 2.** (A) Fractions of SNV mutations in genic and intergenic regions, respectively. (B) Fractions of nonsynonymous and synonymous mutations, respectively. Pink dashed lines represent expectations under no selection.

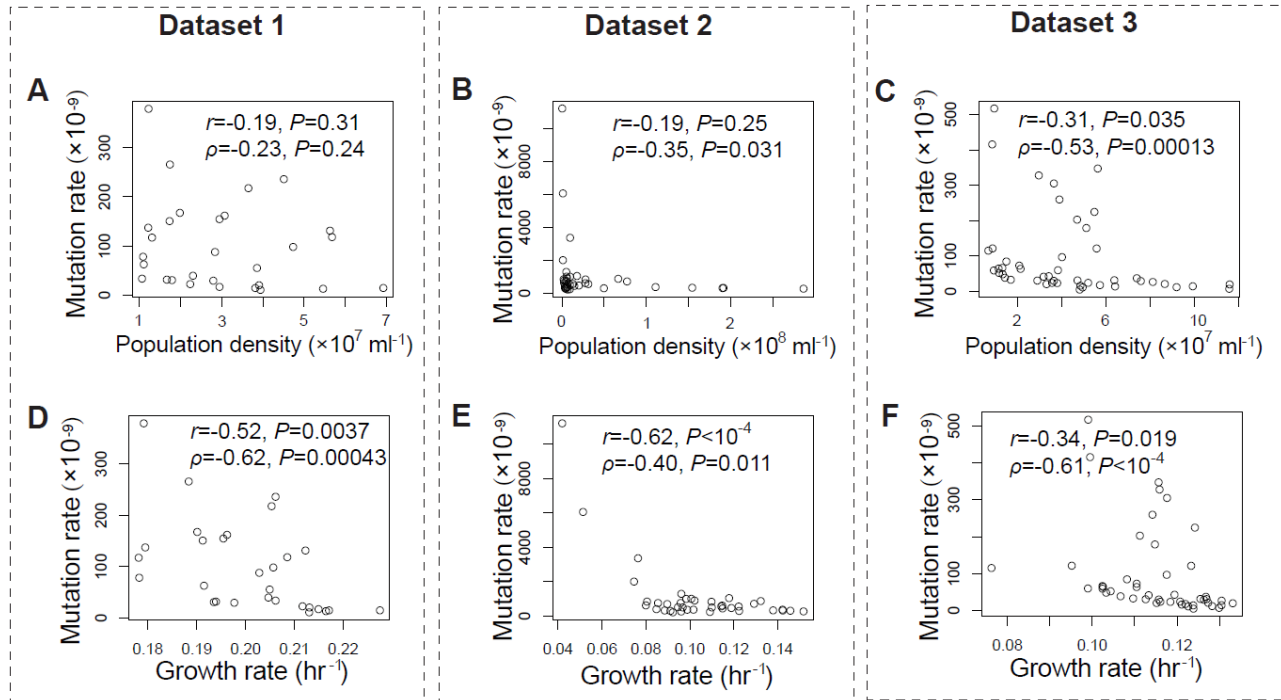

**Figure S2. Correlation between mutation rate and population density or growth rate. Related to Figure 3.** Dataset 1: rate of mutation to 5-Fluoro-orotic resistance in strain S288c; Dataset 2: rate of mutation to hygromycin B resistance in strain BY4742; Dataset 3: rate of mutation to hygromycin B resistance in strain Sigma1278b. (A), (B), and (C) show correlations between population density and mutation rate in these three datasets, whereas (D), (E), and (F) show correlations between growth rate and mutation rate in these three datasets. Spearman's  $\rho$  and Pearson's  $r$  are shown with corresponding  $P$  values. Data are from [1].

| Environments | Recipes                                                                        | Growth rate (hr <sup>-1</sup> ) before MA | Growth rate (hr <sup>-1</sup> ) after MA | Bottleneck interval | Number of bottlenecks | Number of cell divisions* |
|--------------|--------------------------------------------------------------------------------|-------------------------------------------|------------------------------------------|---------------------|-----------------------|---------------------------|
| YPD          | 1% yeast extract, 2% peptone, and 2% dextrose                                  | 0.438                                     | 0.436                                    | 24 h                | 66                    | 999.2                     |
| CuSO4        | YPD with 6 mM CuSO4                                                            | 0.445                                     | 0.441                                    | 24 h                | 64                    | 982.4                     |
| YNB          | 0.17% yeast nitrogen base, 0.5% ammonium sulfate, and 2% dextrose <sup>#</sup> | 0.364                                     | 0.356                                    | 36 h                | 56                    | 1045.8                    |
| YPX          | 1% yeast extract, 2% peptone, and 2% xylose                                    | 0.330                                     | 0.324                                    | 36 h                | 62                    | 1052.8                    |
| LiCl         | YPD with 100 mM LiCl                                                           | 0.266                                     | 0.254                                    | 48 h                | 58                    | 1045.2                    |
| YPL          | 1% yeast extract, 2% peptone, and 2% lactose                                   | 0.253                                     | 0.247                                    | 48 h                | 57                    | 987.2                     |
| NaCl         | YPD with 1 M NaCl                                                              | 0.251                                     | 0.236                                    | 48 h                | 62                    | 1044.1                    |

\* Total number of cell divisions is the number of bottlenecks × (number of cell divisions per bottleneck before MA + number of cell divisions per bottleneck after MA)/2.

<sup>#</sup> 2.5 ml 1 M NaOH is added to 1 L of medium for pH adjustment.

**Table S1. Information on the mutation accumulation experiments in seven environments. Related to Figure 1.**

| Environments | SNV | Small indel | Segmental duplication/deletion | Chromosome gain/loss | Mitochondrial SNV | Mitochondrial indel | No. of cell divisions per line | No. of MA lines | Callable nuclear sites per line | Callable mitochondrial sites per line |
|--------------|-----|-------------|--------------------------------|----------------------|-------------------|---------------------|--------------------------------|-----------------|---------------------------------|---------------------------------------|
| YPD          | 112 | 11          | 1                              | 1                    | 12                | 25                  | 999.2                          | 24              | 24,055,032                      | 85,773                                |
| CuSO4        | 125 | 21          | 0                              | 1                    | 10                | 18                  | 982.4                          | 23              | 24,055,032                      | 85,779                                |
| YNB          | 198 | 17          | 0                              | 3                    | 5                 | 6                   | 1045.8                         | 24              | 24,050,184                      | 85,779                                |
| YPX          | 132 | 20          | 0                              | 0                    | 2                 | 6                   | 1052.8                         | 24              | 24,042,864                      | 85,779                                |
| LiCl         | 403 | 76          | 17                             | 18                   | 0                 | 3                   | 1045.2                         | 23              | 24,058,360                      | 82,553                                |
| YPL          | 166 | 19          | 0                              | 2                    | 2                 | 7                   | 987.2                          | 24              | 24,020,272                      | 85,735                                |
| NaCl         | 279 | 95          | 0                              | 8                    | 1                 | 5                   | 1044.1                         | 24              | 24,035,698                      | 85,779                                |

**Table S2. Number of each type of mutations identified in each environment. Related to Figure 2.**

| Sample                | Genomic position      | Ancestral allele | Mutant allele       | Forward primer (5' to 3') | Reverse primer (5' to 3') | Result    |
|-----------------------|-----------------------|------------------|---------------------|---------------------------|---------------------------|-----------|
| NaCl-22               | ref NC_001135 :83153  | C                | G                   | ACGCAAATGATGAGAAATAG      | ATAATCGAATACCACATAGG      | Confirmed |
| YPD-9                 | ref NC_001136 :149113 | A                | AAAATAAAT           | AATCAAGTCCACGTCCAAGA      | CAATGGCAACGATAACGAAG      | Confirmed |
| YPX-14                | ref NC_001136 :541173 | T                | A                   | CTTGGTAGCAGATATGGAAT      | GTAATCAGAGTAGCTTTCA       | Confirmed |
| YPL-20                | ref NC_001139 :469242 | A                | ATTG                | CTGGTAAATAGTGTGAAGA       | TTCATTTAGGTCATTATCCG      | Confirmed |
| LiCl-12               | ref NC_001139 :549197 | A                | G                   | TTACATGCAGACTACATAGG      | GCATGATCCAAATACGATTG      | Confirmed |
| YPD-12                | ref NC_001139 :789636 | C                | A                   | GAGCGTTACAAAGAATTAGG      | GGTCGATATAGTAGGTAGCC      | Confirmed |
| NaCl-6                | ref NC_001141 :248934 | AT               | A                   | CTCGTCC TTCAGCCGTATAG     | AAAAGTCATAGTCACCCACG      | Confirmed |
| LiCl-9                | ref NC_001142 :637260 | C                | A                   | GTCTTTAATCGTGCATTGGA      | TTCCTTATACGTCAC TTATG     | Confirmed |
| NaCl-12               | ref NC_001143 :21369  | C                | A                   | AAATGGCAAATCATGTCCAC      | TACGGCGAATAGTCTTCATT      | Confirmed |
| CuSO <sub>4</sub> -10 | ref NC_001143 :521153 | C                | G                   | CTAATTCCAATGCAGGTTCCG     | CTAAGATCCGTGTGGTGGT       | Confirmed |
| YNB-18                | ref NC_001144 :213640 | T                | G                   | ATATTTCAATCTCTGCGTCG      | TAGTTGATAGTAAGGGTGGT      | Confirmed |
| YNB-19                | ref NC_001144 :59747  | T                | TCTATATTGAAAAGTAAAC | TCCCTGTAGAGACTGAGGAG      | GGACATAGTAATCAAGGCAC      | Confirmed |
| YPL-8                 | ref NC_001145 :110268 | G                | T                   | GCTGACGTGCCATTAGAATC      | CGTATTGACCCTTGCCTCTT      | Confirmed |
| YPL-14                | ref NC_001145 :65144  | C                | A                   | TCTGCACTTTGAAATGAACA      | ATGATACTCGGTTCCGGTTGA     | Confirmed |
| YPX-15                | ref NC_001145 :888784 | A                | AT                  | GGTTCTGCCACTCTACAAAC      | CAATCTAATATCTCCGCTGT      | Confirmed |
| NaCl-16               | ref NC_001147 :711615 | G                | GT                  | CAGTGGTAATGCAATAAAGG      | GATGATTCCGACGATGACTA      | Confirmed |
| CuSO <sub>4</sub> -10 | ref NC_001148 :197730 | ATATTATTATTGT    | A                   | ATTCATAGGATACACAGCAT      | GACTCACCTGTTCTGCTTTA      | Confirmed |
| YPX-16                | ref NC_001148 :435983 | A                | G                   | ATCACGAAGAGTCAATCAAT      | ACAGTGTAAAGAAGATAACATA    | Confirmed |

**Table S3. Verification of mutations by Sanger sequencing. Related to Figure 2.**

| Sample  | SNV rate | small indel rate | chr gain/loss | seg dup/del | initial growth rate | end growth rate |
|---------|----------|------------------|---------------|-------------|---------------------|-----------------|
| Cu-1    | 5.16E-10 | 1.72E-10         | 0             | 0           | 0.445               | 0.430           |
| Cu-3    | 2.51E-10 | 8.37E-11         | 0             | 0           | 0.449               | 0.449           |
| Cu-4    | 3.29E-10 | 0                | 0             | 0           | 0.447               | 0.466           |
| Cu-5    | 3.69E-10 | 0                | 0             | 0           | 0.398               | 0.417           |
| Cu-6    | 4.07E-10 | 8.14E-11         | 0             | 0           | 0.461               | 0.462           |
| Cu-7    | 3.23E-10 | 8.08E-11         | 0             | 0           | 0.468               | 0.462           |
| Cu-8    | 3.29E-10 | 2.46E-10         | 0             | 0           | 0.458               | 0.457           |
| Cu-9    | 9.82E-10 | 8.18E-11         | 0             | 0           | 0.458               | 0.461           |
| Cu-10   | 5.93E-10 | 1.69E-10         | 0             | 0           | 0.468               | 0.420           |
| Cu-11   | 4.29E-10 | 8.59E-11         | 0             | 0           | 0.452               | 0.424           |
| Cu-12   | 1.67E-10 | 0                | 0.001001      | 0           | 0.447               | 0.454           |
| Cu-13   | 4.22E-10 | 0                | 0             | 0           | 0.456               | 0.435           |
| Cu-14   | 9.15E-10 | 0                | 0             | 0           | 0.465               | 0.439           |
| Cu-15   | 2.59E-10 | 8.63E-11         | 0             | 0           | 0.437               | 0.435           |
| Cu-16   | 5.14E-10 | 8.56E-11         | 0             | 0           | 0.442               | 0.437           |
| Cu-17   | 7.47E-10 | 8.30E-11         | 0             | 0           | 0.461               | 0.445           |
| Cu-18   | 3.42E-10 | 0                | 0             | 0           | 0.458               | 0.420           |
| Cu-19   | 3.48E-10 | 1.74E-10         | 0             | 0           | 0.403               | 0.462           |
| Cu-20   | 5.22E-10 | 1.74E-10         | 0             | 0           | 0.408               | 0.457           |
| Cu-21   | 4.09E-10 | 0                | 0             | 0           | 0.468               | 0.451           |
| Cu-22   | 7.09E-10 | 8.86E-11         | 0             | 0           | 0.403               | 0.445           |
| Cu-23   | 3.51E-10 | 0                | 0             | 0           | 0.444               | 0.413           |
| Cu-24   | 3.62E-10 | 9.06E-11         | 0             | 0           | 0.427               | 0.403           |
| Li-1    | 1.75E-09 | 4.77E-10         | 0.000954      | 0           | 0.265               | 0.257           |
| Li-2    | 1.61E-09 | 4.83E-10         | 0.000966      | 0           | 0.252               | 0.263           |
| Li-3    | 1.91E-09 | 8.29E-11         | 0             | 0           | 0.248               | 0.252           |
| Li-4    | 1.55E-09 | 1.63E-10         | 0             | 0           | 0.266               | 0.244           |
| Li-5    | 1.66E-09 | 3.33E-10         | 0.001997      | 0.001997    | 0.259               | 0.240           |
| Li-6    | 1.15E-09 | 4.10E-10         | 0             | 0           | 0.256               | 0.250           |
| Li-7    | 1.62E-09 | 3.24E-10         | 0.001947      | 0           | 0.255               | 0.256           |
| Li-9    | 1.13E-09 | 3.22E-10         | 0.001934      | 0           | 0.267               | 0.248           |
| Li-10   | 7.75E-10 | 7.75E-11         | 0             | 0           | 0.264               | 0.271           |
| Li-11   | 3.99E-10 | 7.98E-11         | 0.000957      | 0.001914    | 0.266               | 0.254           |
| Li-12   | 8.03E-10 | 8.03E-11         | 0             | 0.000963    | 0.269               | 0.248           |
| Li-13   | 1.09E-09 | 1.55E-10         | 0.001863      | 0           | 0.269               | 0.266           |
| Li-14   | 1.47E-09 | 1.55E-10         | 0.000930      | 0           | 0.269               | 0.267           |
| Li-15   | 1.71E-09 | 4.89E-10         | 0             | 0.000978    | 0.274               | 0.235           |
| Li-16   | 1.82E-09 | 4.54E-10         | 0.001816      | 0           | 0.283               | 0.265           |
| Li-17   | 1.30E-09 | 1.53E-10         | 0.000918      | 0           | 0.276               | 0.267           |
| Li-18   | 2.10E-09 | 6.47E-10         | 0.000970      | 0.002910    | 0.261               | 0.252           |
| Li-19   | 7.83E-10 | 7.83E-11         | 0             | 0           | 0.267               | 0.263           |
| Li-20   | 7.80E-10 | 7.80E-11         | 0.001872      | 0           | 0.280               | 0.252           |
| Li-21   | 1.55E-09 | 5.17E-10         | 0             | 0.006200    | 0.267               | 0.215           |
| Li-22   | 1.45E-09 | 3.22E-10         | 0             | 0           | 0.271               | 0.244           |
| Li-23   | 8.42E-10 | 7.66E-11         | 0             | 0           | 0.281               | 0.261           |
| Li-24   | 3.00E-09 | 1.58E-10         | 0             | 0.001894    | 0.257               | 0.269           |
| NaCl-1  | 7.47E-10 | 3.32E-10         | 0             | 0           | 0.246               | 0.222           |
| NaCl-2  | 6.24E-10 | 2.34E-10         | 0             | 0           | 0.250               | 0.248           |
| NaCl-3  | 5.60E-10 | 2.40E-10         | 0             | 0           | 0.241               | 0.244           |
| NaCl-4  | 8.09E-10 | 8.09E-11         | 0             | 0           | 0.244               | 0.236           |
| NaCl-5  | 9.62E-10 | 2.41E-10         | 0             | 0           | 0.252               | 0.232           |
| NaCl-6  | 1.57E-09 | 4.96E-10         | 0.000992      | 0           | 0.231               | 0.239           |
| NaCl-7  | 5.96E-10 | 5.11E-10         | 0             | 0           | 0.240               | 0.216           |
| NaCl-8  | 1.02E-09 | 3.14E-10         | 0             | 0           | 0.258               | 0.237           |
| NaCl-9  | 1.11E-09 | 1.58E-10         | 0.001898      | 0           | 0.253               | 0.238           |
| NaCl-10 | 3.17E-10 | 0                | 0             | 0           | 0.236               | 0.255           |
| NaCl-11 | 7.45E-10 | 1.65E-10         | 0             | 0           | 0.239               | 0.231           |
| NaCl-12 | 1.14E-09 | 6.52E-10         | 0             | 0           | 0.250               | 0.226           |

|         |          |          |          |          |       |       |
|---------|----------|----------|----------|----------|-------|-------|
| NaCl-13 | 7.91E-10 | 2.37E-10 | 0        | 0        | 0.259 | 0.232 |
| NaCl-14 | 1.25E-09 | 3.14E-10 | 0        | 0        | 0.248 | 0.247 |
| NaCl-15 | 7.33E-10 | 3.26E-10 | 0        | 0        | 0.262 | 0.215 |
| NaCl-16 | 1.05E-09 | 3.22E-10 | 0        | 0        | 0.254 | 0.228 |
| NaCl-17 | 1.04E-09 | 4.01E-10 | 0.000962 | 0        | 0.260 | 0.225 |
| NaCl-18 | 5.39E-10 | 2.31E-10 | 0        | 0        | 0.259 | 0.245 |
| NaCl-19 | 7.27E-10 | 4.04E-10 | 0.000969 | 0        | 0.259 | 0.222 |
| NaCl-20 | 1.62E-09 | 8.47E-10 | 0.000924 | 0        | 0.252 | 0.252 |
| NaCl-21 | 7.24E-10 | 1.61E-10 | 0.000966 | 0        | 0.239 | 0.243 |
| NaCl-22 | 1.45E-09 | 5.34E-10 | 0        | 0        | 0.259 | 0.250 |
| NaCl-23 | 1.09E-09 | 2.33E-10 | 0.000933 | 0        | 0.263 | 0.236 |
| NaCl-24 | 1.00E-09 | 1.54E-10 | 0        | 0        | 0.259 | 0.244 |
| YNB-1   | 5.44E-10 | 0        | 0        | 0        | 0.370 | 0.367 |
| YNB-2   | 4.71E-10 | 0        | 0        | 0        | 0.360 | 0.371 |
| YNB-3   | 6.54E-10 | 0        | 0        | 0        | 0.345 | 0.355 |
| YNB-4   | 3.96E-10 | 0        | 0        | 0        | 0.376 | 0.347 |
| YNB-5   | 4.74E-10 | 0        | 0        | 0        | 0.363 | 0.363 |
| YNB-6   | 9.66E-10 | 1.61E-10 | 0.000966 | 0        | 0.362 | 0.349 |
| YNB-7   | 7.30E-10 | 8.11E-11 | 0        | 0        | 0.366 | 0.340 |
| YNB-8   | 4.02E-10 | 8.03E-11 | 0        | 0        | 0.366 | 0.347 |
| YNB-9   | 5.06E-10 | 0        | 0        | 0        | 0.350 | 0.329 |
| YNB-10  | 4.85E-10 | 0        | 0        | 0        | 0.354 | 0.355 |
| YNB-11  | 3.19E-10 | 0        | 0        | 0        | 0.352 | 0.366 |
| YNB-12  | 1.13E-09 | 1.61E-10 | 0        | 0        | 0.355 | 0.355 |
| YNB-13  | 2.34E-10 | 7.81E-11 | 0        | 0        | 0.370 | 0.363 |
| YNB-14  | 6.08E-10 | 0        | 0.000913 | 0        | 0.374 | 0.380 |
| YNB-15  | 7.44E-10 | 8.27E-11 | 0        | 0        | 0.351 | 0.342 |
| YNB-16  | 7.80E-10 | 1.56E-10 | 0        | 0        | 0.367 | 0.367 |
| YNB-17  | 7.34E-10 | 0        | 0        | 0        | 0.362 | 0.340 |
| YNB-18  | 9.67E-10 | 1.61E-10 | 0        | 0        | 0.360 | 0.351 |
| YNB-19  | 4.82E-10 | 2.41E-10 | 0        | 0        | 0.361 | 0.352 |
| YNB-20  | 7.83E-10 | 0        | 0        | 0        | 0.382 | 0.350 |
| YNB-21  | 1.24E-09 | 7.76E-11 | 0        | 0        | 0.376 | 0.363 |
| YNB-22  | 7.13E-10 | 7.92E-11 | 0        | 0        | 0.375 | 0.348 |
| YNB-23  | 6.34E-10 | 0        | 0.000951 | 0        | 0.363 | 0.360 |
| YNB-24  | 7.77E-10 | 0        | 0        | 0        | 0.365 | 0.372 |
| YPD-1   | 1.65E-10 | 0        | 0        | 0        | 0.469 | 0.413 |
| YPD-2   | 4.14E-10 | 8.28E-11 | 0        | 0        | 0.444 | 0.437 |
| YPD-3   | 4.12E-10 | 0        | 0        | 0        | 0.446 | 0.439 |
| YPD-4   | 3.29E-10 | 0        | 0        | 0        | 0.458 | 0.430 |
| YPD-5   | 2.43E-10 | 8.10E-11 | 0        | 0.000972 | 0.449 | 0.451 |
| YPD-6   | 5.92E-10 | 0        | 0        | 0        | 0.401 | 0.461 |
| YPD-7   | 6.69E-10 | 8.36E-11 | 0.001003 | 0        | 0.440 | 0.432 |
| YPD-8   | 3.30E-10 | 2.47E-10 | 0        | 0        | 0.440 | 0.444 |
| YPD-9   | 4.14E-10 | 8.29E-11 | 0        | 0        | 0.440 | 0.439 |
| YPD-10  | 5.97E-10 | 0        | 0        | 0        | 0.446 | 0.408 |
| YPD-11  | 2.51E-10 | 0        | 0        | 0        | 0.437 | 0.435 |
| YPD-12  | 6.01E-10 | 0        | 0        | 0        | 0.433 | 0.417 |
| YPD-13  | 1.74E-10 | 0        | 0        | 0        | 0.415 | 0.424 |
| YPD-14  | 5.35E-10 | 0        | 0        | 0        | 0.391 | 0.427 |
| YPD-15  | 4.31E-10 | 0        | 0        | 0        | 0.430 | 0.417 |
| YPD-16  | 3.38E-10 | 1.69E-10 | 0        | 0        | 0.420 | 0.444 |
| YPD-17  | 3.39E-10 | 0        | 0        | 0        | 0.444 | 0.417 |
| YPD-18  | 1.70E-10 | 0        | 0        | 0        | 0.420 | 0.437 |
| YPD-19  | 2.38E-10 | 0        | 0        | 0        | 0.454 | 0.465 |
| YPD-20  | 4.89E-10 | 0        | 0        | 0        | 0.444 | 0.451 |
| YPD-21  | 4.93E-10 | 0        | 0        | 0        | 0.430 | 0.458 |
| YPD-22  | 5.76E-10 | 8.22E-11 | 0        | 0        | 0.470 | 0.417 |
| YPD-23  | 2.47E-10 | 0        | 0        | 0        | 0.444 | 0.442 |
| YPD-24  | 3.19E-10 | 7.97E-11 | 0        | 0        | 0.456 | 0.458 |
| YPL-1   | 6.87E-10 | 0        | 0        | 0        | 0.254 | 0.238 |

|        |          |          |          |   |       |       |
|--------|----------|----------|----------|---|-------|-------|
| YPL-2  | 4.23E-10 | 8.46E-11 | 0        | 0 | 0.257 | 0.242 |
| YPL-3  | 5.12E-10 | 8.53E-11 | 0        | 0 | 0.255 | 0.240 |
| YPL-4  | 1.08E-09 | 1.66E-10 | 0        | 0 | 0.260 | 0.249 |
| YPL-5  | 8.31E-11 | 0        | 0        | 0 | 0.260 | 0.248 |
| YPL-6  | 8.35E-10 | 0        | 0        | 0 | 0.269 | 0.237 |
| YPL-7  | 6.80E-10 | 1.70E-10 | 0        | 0 | 0.248 | 0.249 |
| YPL-8  | 1.02E-09 | 1.70E-10 | 0.001018 | 0 | 0.248 | 0.250 |
| YPL-9  | 2.49E-10 | 8.30E-11 | 0        | 0 | 0.258 | 0.251 |
| YPL-10 | 4.24E-10 | 8.47E-11 | 0        | 0 | 0.252 | 0.246 |
| YPL-11 | 8.44E-11 | 0        | 0        | 0 | 0.265 | 0.236 |
| YPL-12 | 3.25E-10 | 1.62E-10 | 0        | 0 | 0.264 | 0.256 |
| YPL-13 | 4.95E-10 | 0        | 0        | 0 | 0.260 | 0.251 |
| YPL-14 | 3.36E-10 | 1.68E-10 | 0        | 0 | 0.252 | 0.250 |
| YPL-15 | 8.30E-10 | 8.30E-11 | 0        | 0 | 0.249 | 0.259 |
| YPL-16 | 1.03E-09 | 0        | 0        | 0 | 0.240 | 0.249 |
| YPL-17 | 6.81E-10 | 8.52E-11 | 0        | 0 | 0.247 | 0.248 |
| YPL-18 | 5.08E-10 | 0        | 0        | 0 | 0.247 | 0.252 |
| YPL-19 | 7.59E-10 | 8.44E-11 | 0.001013 | 0 | 0.255 | 0.245 |
| YPL-20 | 5.10E-10 | 8.50E-11 | 0        | 0 | 0.254 | 0.243 |
| YPL-21 | 2.50E-10 | 0        | 0        | 0 | 0.253 | 0.252 |
| YPL-22 | 1.25E-09 | 0        | 0        | 0 | 0.238 | 0.237 |
| YPL-23 | 7.77E-10 | 8.64E-11 | 0        | 0 | 0.239 | 0.249 |
| YPL-24 | 2.57E-10 | 0        | 0        | 0 | 0.250 | 0.244 |
| YPX-1  | 6.14E-10 | 7.68E-11 | 0        | 0 | 0.345 | 0.329 |
| YPX-2  | 1.58E-10 | 1.58E-10 | 0        | 0 | 0.330 | 0.326 |
| YPX-3  | 5.53E-10 | 0        | 0        | 0 | 0.335 | 0.320 |
| YPX-4  | 3.12E-10 | 2.34E-10 | 0        | 0 | 0.331 | 0.333 |
| YPX-5  | 3.99E-10 | 1.59E-10 | 0        | 0 | 0.332 | 0.317 |
| YPX-6  | 2.46E-10 | 0        | 0        | 0 | 0.329 | 0.303 |
| YPX-7  | 1.58E-10 | 7.89E-11 | 0        | 0 | 0.340 | 0.316 |
| YPX-8  | 1.05E-09 | 0        | 0        | 0 | 0.328 | 0.314 |
| YPX-9  | 4.67E-10 | 0        | 0        | 0 | 0.327 | 0.337 |
| YPX-10 | 6.39E-10 | 7.99E-11 | 0        | 0 | 0.320 | 0.328 |
| YPX-11 | 5.50E-10 | 0        | 0        | 0 | 0.334 | 0.324 |
| YPX-12 | 4.64E-10 | 7.74E-11 | 0        | 0 | 0.340 | 0.329 |
| YPX-13 | 5.53E-10 | 7.90E-11 | 0        | 0 | 0.330 | 0.325 |
| YPX-14 | 3.24E-10 | 0        | 0        | 0 | 0.316 | 0.322 |
| YPX-15 | 2.44E-10 | 1.63E-10 | 0        | 0 | 0.324 | 0.313 |
| YPX-16 | 4.80E-10 | 0        | 0        | 0 | 0.328 | 0.320 |
| YPX-17 | 8.37E-10 | 8.37E-11 | 0        | 0 | 0.318 | 0.301 |
| YPX-18 | 2.29E-10 | 1.53E-10 | 0        | 0 | 0.335 | 0.341 |
| YPX-19 | 5.45E-10 | 7.78E-11 | 0        | 0 | 0.334 | 0.331 |
| YPX-20 | 1.55E-10 | 0        | 0        | 0 | 0.328 | 0.339 |
| YPX-21 | 2.37E-10 | 0        | 0        | 0 | 0.337 | 0.320 |
| YPX-22 | 4.75E-10 | 7.91E-11 | 0        | 0 | 0.328 | 0.326 |
| YPX-23 | 4.84E-10 | 0        | 0        | 0 | 0.322 | 0.319 |
| YPX-24 | 3.09E-10 | 7.73E-11 | 0        | 0 | 0.332 | 0.338 |

**Table S4. Rates of four types of mutations and growth rate of each sample. Related to Figure 3.** SNV rate and small indel rate shown are numbers of events per nucleotide per cell division, whereas chromosome gain/loss rate and segmental duplication/deletion rate shown are numbers of events per cell division.



| Factors being correlated |               | Factor controlled  | Dataset | Pearson's correlation ( <i>P</i> -value) | Spearman's correlation ( <i>P</i> -value) |
|--------------------------|---------------|--------------------|---------|------------------------------------------|-------------------------------------------|
| Growth rate              | Mutation rate | Population density | 1       | -0.61 (0.00057)                          | -0.71 (<10 <sup>-4</sup> )                |
| Growth rate              | Mutation rate | Population density | 2       | -0.73 (<10 <sup>-4</sup> )               | -0.23 (0.16)                              |
| Growth rate              | Mutation rate | Population density | 3       | -0.16 (0.30)                             | -0.37 (0.012)                             |
| Population density       | Mutation rate | Growth rate        | 1       | 0.41 (0.029)                             | 0.48 (0.0096)                             |
| Population density       | Mutation rate | Growth rate        | 2       | 0.51 (0.00098)                           | 0.073 (0.66)                              |
| Population density       | Mutation rate | Growth rate        | 3       | -0.044 (0.77)                            | 0.080 (0.60)                              |

**Table S5. Partial correlations between population density (or growth rate) and mutation rate upon the control of growth rate (or population density) in three yeast datasets. Related to Figure 3.** Dataset 1: rate of mutation to 5-Fluoro-orotic resistance in strain S288c; Dataset 2: rate of mutation to hygromycin B resistance in strain BY4742; Dataset 3: rate of mutation to hygromycin B resistance in strain Sigma1278b. Data are from [1].

#### SUPPLEMENTAL REFERENCE

1. Krašovec, R., Richards, H., Gifford, D.R., Hatcher, C., Faulkner, K.J., Belavkin, R.V., Channon, A., Aston, E., McBain, A.J., and Knight, C.G. (2017). Spontaneous mutation rate is a plastic trait associated with population density across domains of life. *PLoS Biol* 15, e2002731.
